# Supplementary material for: Tuning carbon nanotube assembly for flexible, strong and conductive films
Source: Royal Society of Chemistry journal article supplement (doi:10.1039/c4nr06401a), 2014-12-26
Supplement: c4nr06401a1.pdf [file c4nr06401a1.pdf]

Electronic Supplementary Information

## Tuning Carbon Nanotube Assembly for Flexible Strong and Conductive Film

Yanjie Wang,<sup>a</sup> Min Li,<sup>a,\*</sup> Yizhuo Gu,<sup>a</sup> Xiaohua Zhang,<sup>b</sup> Shaokai Wang,<sup>a</sup> Qingwen Li,<sup>b,\*</sup> Zuoguang Zhang<sup>a</sup>

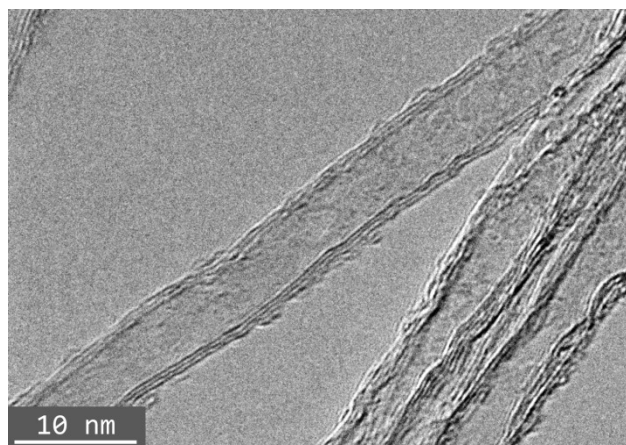

Figure S1. TEM image of array CNTs.

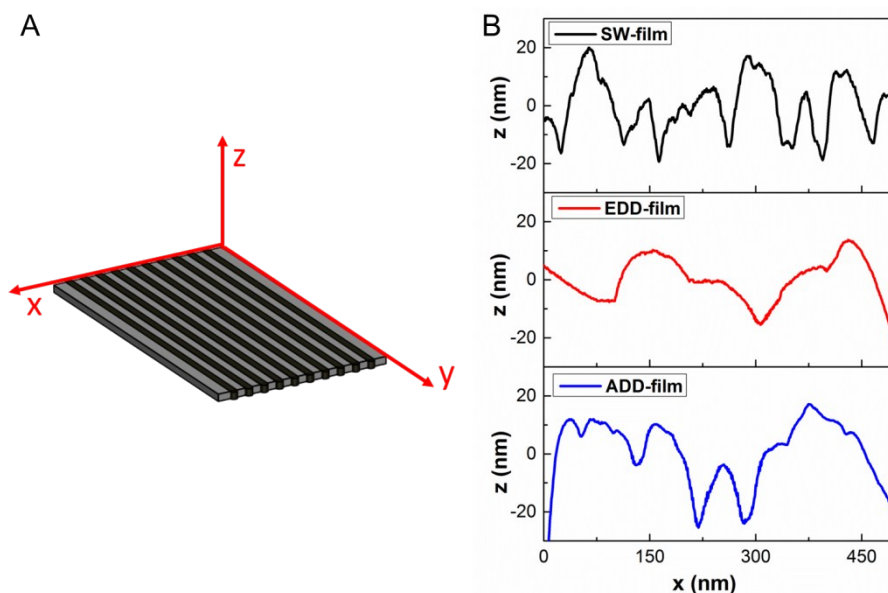

Figure S2. (A) Schematic diagram defining the directions of the aligned CNT film. (B) The surface height curves of x-z cross-section of SW-film, EDD-film and ADD-film. The curves were obtained by AFM and the range of convex part could reflect bundle's size.

**Table S1.** Properties comparison between the pure CNT films of this work with other CNT films/fibers spun from CNT array in references.

| Film Type           | CNT Type | Tensile Strength | Tensile Modulus | Reference |
|---------------------|----------|------------------|-----------------|-----------|
|                     |          | [GPa]            | [GPa]           |           |
| <b>As-spun film</b> | FWCNT    | 0.19±0.02        | 14±2            | This work |
| <b>SW-film</b>      | FWCNT    | 1.08±0.07        | 43±5            | This work |
| <b>EDD-film</b>     | FWCNT    | 2.58±0.15        | 124±14          | This work |
| <b>ADD-film</b>     | FWCNT    | 3.19±0.10        | 102±9           | This work |
| <b>Pure film</b>    | MWCNT    | 0.008            | 0.785           | [1]       |
| <b>As-spun film</b> | MWCNT    | 0.092            | 3               | [2]       |
| <b>Pure film</b>    | MWCNT    | 0.46             | -               | [3]       |
| <b>Pure film</b>    | MWCNT    | 0.14             | 7               | [4]       |
| <b>Pure film</b>    | MWCNT    | 0.41±0.04        | 11±2            | [5]       |
| <b>Pure film</b>    | MWCNT    | 1.01±0.18        | 12±3            | [5]       |
| <b>Pure film</b>    | FWCNT    | 0.52±0.04        | 20±4            | [5]       |
| <b>Pure film</b>    | FWCNT    | 1.66±0.27        | 60±8            | [5]       |
| <b>Pure film</b>    | FWCNT    | 2.0              | 90              | [6]       |
| <b>Pure Fiber</b>   | FWCNT    | 1.17             | 53.5            | [7]       |
| <b>Pure Fiber</b>   | FWCNT    | 1.23             | 40-50           | [8]       |
| <b>Pure Fiber</b>   | FWCNT    | 0.93             | 29.7            | [9]       |
| <b>Pure Fiber</b>   | FWCNT    | 0.65             | 42              | [10]      |
| <b>Pure Fiber</b>   | MWCNT    | 0.6              | 37              | [11]      |
| <b>Pure Fiber</b>   | MWCNT    | 1.6              | 110             | [12]      |
| <b>Pure Fiber</b>   | MWCNT    | 1.2±0.3          | 43.3±7.4        | [13]      |

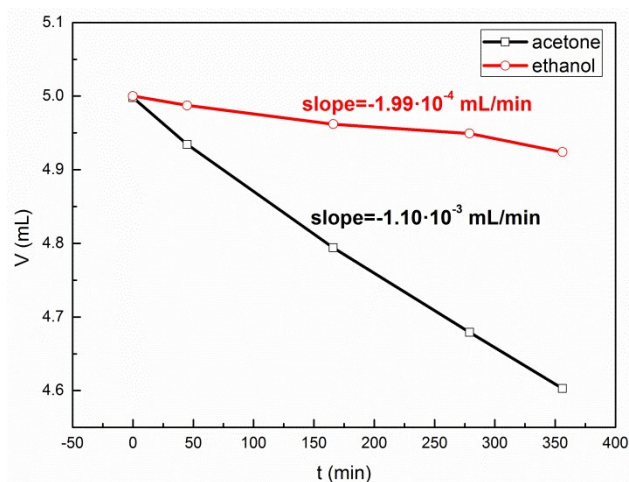

**Figure S3.** The measured evaporation rates of ethanol and acetone using a 5 mL graduated cylinder (25 °C, RH 50%).

- 1 G. Xu, Q. Zhang, W. Zhou, J. Huang, F. Wei, *Appl. Phys. A: Mater. Sci. Process.*, 2008, **92**, 531.
- 2 X. Wang, P. D. Bradford, W. Liu, H. Zhao, Y. Inoueb, J. P. Mariaa, Q. Li, F. G. Yuan, Y. Zhu, *Compos. Sci. Technol.*, 2011, **71**, 1677.
- 3 W. Liu, X. Zhang, G. Xu, P. D. Bradford, X. Wang, H. Zhao, Y. Zhang, Q. Jia, F. Yuan, Q. Li, Y. Qiu, Y. Zhu, *Carbon*, 2011, **49**, 4786.
- 4 W. Liu, H. Zhao, Y. Inoue, X. Wang, P. D. Bradford, H. Kim, Y. Qiu, Y. Zhu, *Composites, Part A*, 2012, **43**, 587.
- 5 Y. Liu, M. Li, Y. Gu, K. Wang, D. Hu, Q. W. Li, Z. G. Zhang, *Carbon*, 2013, **65**, 187.
- 6 J. T. Di, D. M. Hu, H. Chen, Z. Yong, M. Chen, Z. Feng, Y. Zhu, Q. Li, *ACS Nano*, 2012, **6**, 5457.
- 7 J. Jia, J. Zhao, G. Xu, J. Di, Z. Yong, Y. Tao, C. Fang, Z. Zhang, X. Zhang, L. Zheng, Q. Li, *Carbon*, 2011, **49**, 1333.
- 8 J. Zhao, X. Zhang, J. Di, G. Xu, X. Yang, X. Liu, Z. Yong, M. Chen, Q. Li, *Small*, 2010, **6**, 2612.
- 9 F. Meng, J. Zhao, Y. Ye, X. Zhang, S. Li, J. Jia, Z. Zhang, Q. Li, *J. Mater. Chem.*, 2012, **22**, 16277.
- 10 G. Xu, J. Zhao, S. Li, X. Zhang, Z. Yong, Q. Li, *Nanoscale*, 2011, **3**, 4215.
- 11 X. Zhang, K. Jiang, C. Feng, P. Liu, L. Zhang, J. Kong, T. Zhang, Q. Li, S. Fan, *Adv. Mater.*, 2006, **18**, 1505.
- 12 K. Liu, F. Zhu, L. Liu, Y. Sun, S. Fan, K. Jiang, *Nanoscale*, 2012, **4**, 3389.
- 13 M. Zu, Q. Li, Y. Zhu, M. Dey, G. Wang, W. Lu, J. M. Deitzel, J. W. Gillespie Jr., J. H. Byun, T. W. Chou, *Carbon*, 2012, **50**, 1271.
